# Supplementary material for: Recombinant HDL (Milano) protects endotoxin-challenged rats from multiple organ injury and dysfunction
Source: publisher site journal article supplement (doi:10.1515/hsz-2014-0188), 2014-09-03
Supplement: Supplementary file 1 [file hsz-2014-0188_Supplementary_material_14-188.docx]

**Supplementary material**

**Supplementary Table 1** Experimental design.

| **Group** | **Pre-injection** | **Model injection** |
| --- | --- | --- |
| **Saline** | 1 ml/kg Saline | 1 ml/kg Saline |
| **Endotoxin** | 1 ml/kg Saline | 400 Eu/kg Endotoxin |
| **SPC** | 135 mg/kg Soybeanlecithin | 400 Eu/kg Endotoxin |
| **rHDLwt** | 40 mg/kg rHDLwt | 400 Eu/kg Endotoxin |
| **rHDLMilano** | 40 mg/kg rHDLMilano | 400 Eu/kg Endotoxin |
